# Supplementary material for: Single cell sequencing identifies clonally expanded synovial CD4+ TPH cells expressing GPR56 in rheumatoid arthritis
Source: PubMed Central journal article supplement (PMC9279430; doi:10.1038/s41467-022-31519-6), 2022-07-13
Supplement: 41467_2022_31519_MOESM3_ESM.pdf [file 41467_2022_31519_MOESM3_ESM.pdf]

## Description of Additional Supplementary Files

**Supplementary Data 1.** Patient characteristics

**Supplementary Data 2.** CD4<sup>+</sup> T cell type composition in PBMC and SFMC in RA patients (n=4 ACPA-, n=4 ACPA+) (Frequencies)

**Supplementary Data 3.** Differentially expressed genes in the 12 CD4<sup>+</sup> T cell clusters in combined peripheral blood and synovial fluid (n=15 RA patients, 11 ACPA+, 4 ACPA-)

**Supplementary Data 4.** CDR3 alpha/beta amino-acid sequences in annotated CD4<sup>+</sup> T cell clusters in peripheral blood in n=8 RA patients (4 ACPA- and 4 ACPA+)

**Supplementary Data 5.** CDR3 alpha/beta amino-acid sequences in annotated CD4<sup>+</sup> T cell clusters in synovial fluid in n=8 RA patients (4 ACPA- and 4 ACPA+)

**Supplementary Data 6.** Phenotype (CD4<sup>+</sup> T cell clusters) and TCR clonality sharing of expanded CD4<sup>+</sup> T cell clones

- a. TCR a/b recovery in CD4<sup>+</sup> T cells in SF and PB (n=4 ACPA+; n=4 ACPA-)
- b. Phenotype of expanded CD4<sup>+</sup> T cell clones in ACPA+ SF (n=4) and ACPA- (n=3)
- c. Phenotype of expanded CD4<sup>+</sup> T cell clones in ACPA+ PB (n=4) and ACPA- (n=3)
- d. Phenotype of expanded CD4<sup>+</sup> T cell clones which are shared between CD4<sup>+</sup> T cell clusters (n=4 ACPA+ SF and n=3 ACPA- SF)
- e. Sharing of CDR3s with CXCL13high T<sub>PH</sub> (first table), Tregs (second table), effector CD4<sup>+</sup> T cells (third table) and cytotoxic CD4<sup>+</sup> T cells (fourth table) clones in ACPA+ SF (n=4) and ACPA- (n=3)

**Supplementary Data 7.** CDR3 alpha/beta amino acid sequences shared in annotated CD4<sup>+</sup> T cell clusters in synovial fluid in ACPA+ SF (n=4) and ACPA- (n=3)

**Supplementary Data 8.** Flow cytometry antibodies

**Supplementary Data 9.** Flow cytometry panels
